# Supplementary material for: Study protocol for a population-based observational surveillance study of culture-confirmed neonatal bloodstream infections and meningitis in South Africa: Baby GERMS-SA
Source: PubMed Central journal article supplement (PMC8830263; doi:10.1136/bmjopen-2021-049070), 2022-02-08
Supplement: bmjopen-2021-049070supp001.pdf [file bmjopen-2021-049070supp001.pdf]

## **A study protocol for a population-based observational surveillance study describing culture-confirmed neonatal bloodstream infections and meningitis in South Africa: Baby GERMS-SA**

### Authors

Susan Meiring<sup>1,2</sup>; Rudzani Mathebula<sup>3</sup>; Rindidzani Magobo<sup>3</sup>; Olga Perovic<sup>3,4</sup>; Vanessa Quan<sup>1</sup>; Cheryl Cohen<sup>2,5</sup>; Linda de Gouveia<sup>5</sup>; Anne von Gottberg<sup>4,5,6</sup>; Cheryl Mackay<sup>7</sup>; Mphekwa T. Mailula<sup>8</sup>; Rose Phayane<sup>9</sup>; Angela Dramowski<sup>10</sup>; Nelesh P. Govender<sup>3,4,6</sup> for Baby GERMS-SA

### Affiliations

1. Division of Public Health Surveillance and Response, National Institute for Communicable Diseases, a Division of the National Health Laboratory Service, Johannesburg, South Africa
2. School of Public Health, Faculty of Health Sciences, University of the Witwatersrand, Johannesburg, South Africa
3. Centre for Healthcare-Associated Infections, Antimicrobial Resistance and Mycoses, National Institute for Communicable Diseases, a Division of the National Health Laboratory Service, Johannesburg, South Africa
4. Department of Clinical Microbiology and Infectious Diseases, School of Pathology, Faculty of Health Sciences, University of Witwatersrand, Johannesburg, South Africa
5. Centre for Respiratory Diseases and Meningitis, National Institute for Communicable Diseases, a Division of the National Health Laboratory Service, Johannesburg, South Africa
6. Division of Medical Microbiology, School of Pathology, Faculty of Health Sciences, University of Cape Town, South Africa
7. Department of Paediatrics and Child Health, Dora Nginza Hospital, Nelson Mandela Bay, South Africa
8. Department of Paediatrics and Child Health, Mankweng Regional Hospital, Mankweng, South Africa
9. Department of Paediatrics and Child Health, Tembisa Provincial Hospital, Johannesburg, South Africa
10. Department of Paediatrics and Child Health, Division of Paediatric Infectious Diseases, Faculty of Medicine and Health Sciences, Stellenbosch University, Cape Town, South Africa

Baby GERMS neonatal sepsis surveillance protocol

Supplementary material

**Supplementary table: Baby GERMS neonatal sepsis surveillance project data dictionary for tier 2 enhanced surveillance data collection tool on REDCap**

| Variable / Field Name | Form Name         | Field Type | Field Label                                                                          |
|-----------------------|-------------------|------------|--------------------------------------------------------------------------------------|
| study_id              | lab_form          | text       | Patient Study ID                                                                     |
| episode_no            | lab_form          | text       | Episode Number                                                                       |
| patient_surname       | lab_form          | text       | Patient Surname                                                                      |
| patient_name          | lab_form          | text       | Patient First Names                                                                  |
| birth_date            | lab_form          | text       | Date of birth                                                                        |
| gender                | lab_form          | text       | Gender                                                                               |
| folder_no             | lab_form          | text       | Folder Number                                                                        |
| spec_date             | lab_form          | text       | First specimen collection date                                                       |
| hosp_name             | lab_form          | text       | Hospital name                                                                        |
| province_name         | lab_form          | text       | Province name                                                                        |
| spec_type             | lab_form          | text       | Specimen type                                                                        |
| organism_name         | lab_form          | text       | Organism Name                                                                        |
| received_by_charm     | lab_form          | text       | Received by CHARM                                                                    |
| specm_date            | isolates          | text       | Specimen Collection date                                                             |
| nicu_admdate          | treatment_history | text       | NICU admission date                                                                  |
| pt_ref                | treatment_history | dropdown   | Was patient referred from another hospital                                           |
| ref_date              | story             | text       | Date of admission at [ref_facility]                                                  |
| ref_facility          | treatment_history | text       | If Yes, state facility name where patient was referred from                          |
| ref_days              | story             | calc       | Number of days at referred facility [ref_facility] before transferred to [hosp_name] |
| adm_birth_yes         | treatment_history | radio      | Was the baby admitted since birth [yes/no]                                           |
| trans_outfac          | story             | dropdown   | Was patient transferred to another hospital?                                         |
| date_transf           | treatment_history | text       | Date transferred out to [fac_name]                                                   |
| fac_name              | story             | text       | If Yes, specify hospital name                                                        |
| momhiv_status         | treatment_history | radio      | Maternal HIV Status of [mom_surname] [mom_name]                                      |
| hivstatus_child       | story             | radio      | HIV status child                                                                     |
| hivtest               | treatment_history | radio      | HIV test type                                                                        |
| hiv_date              | story             | text       | HIV Test date                                                                        |
| child_exposure        | treatment_history | radio      | Was the child exposed to HIV-infection [exposed/unexposed]                           |

Baby GERMS neonatal sepsis surveillance protocol Supplementary material

|                |                   |          |                                                                            |
|----------------|-------------------|----------|----------------------------------------------------------------------------|
| antib_prior    | treatment_history | dropdown | Antimicrobial treatment in 2 weeks prior to culture?                       |
| diagn_organism | treatment_history | checkbox | Diagnosis related to organism isolated                                     |
| del_mode       | antenatal_history | checkbox | Type of delivery                                                           |
| gestage        | antenatal_history | text     | Gestational age at birth                                                   |
| prem_reason    | antenatal_history | radio    | If Gestational age of [gestage] weeks is below 37, state premature reasons |
| mat_cond       | antenatal_history | checkbox | Maternal condition                                                         |
| fet_cond       | antenatal_history | checkbox | Fetal conditions                                                           |
| antib_intrap   | antenatal_history | dropdown | Were intrapartum antibiotics given to the mother?                          |
| antib_intra    | antenatal_history | checkbox | If YES state antibiotics prescribed and dates                              |
| birth_wght     | antenatal_history | text     | Birth weight                                                               |
| pregn_type     | antenatal_history | dropdown | Pregnancy type [singleton, twin, triplet, etc]                             |
| birth_plc      | antenatal_history | dropdown | Place of birth                                                             |
| home_birth     | antenatal_history | dropdown | If delivery at Home, was birth attended?                                   |
| resusc         | antenatal_history | dropdown | Was resuscitation required at birth?                                       |
| resusc_type    | antenatal_history | radio    | Types of resuscitation                                                     |
| resusc_oth     | antenatal_history | text     | If Other resuscitation, specify                                            |
| apgr_1min      | antenatal_history | text     | Apgar score at 1 minute                                                    |
| apgr_5min      | antenatal_history | text     | Apgar score at 5 minutes                                                   |
| apgr_10min     | antenatal_history | text     | Apgar score at 10 minutes                                                  |
| anten_steroids | antenatal_history | dropdown | Antenatal steroids use                                                     |
| preg_num       | antenatal_history | text     | Total number of pregnancies (gravidity)                                    |
| preg_birth     | antenatal_history | text     | Total number of births (parity) include this child in the number           |
| mom_age        | antenatal_history | text     | Maternal age of [mom_surname] [mom_name] in Years                          |
| mom_educ       | antenatal_history | dropdown | Maternal education of [mom_surname] [mom_name]                             |
| relat_status   | antenatal_history | dropdown | Relationship status of [mom_surname] [mom_name]                            |
| empl_status    | antenatal_history | dropdown | Employment status of Mother, [mom_name] [mom_surname]                      |
| preg_compl     | antenatal_history | radio    | Any pregnancy related infection?                                           |

## Baby GERMS neonatal sepsis surveillance protocol

## Supplementary material

|                |                     |                |                                                                                                                                      |
|----------------|---------------------|----------------|--------------------------------------------------------------------------------------------------------------------------------------|
| curr_wght      | medical_hist<br>ory | text           | Current weight done closest to specimen date [spec_date]                                                                             |
| invasive       | medical_hist<br>ory | radio          | Invasive devices required by the child?                                                                                              |
| invas_spec     | medical_hist<br>ory | checkbox<br>ox | If Invasive = [invasive] specify, select all that apply                                                                              |
| pulse_rate     | medical_hist<br>ory | radio          | Pulse rate                                                                                                                           |
| resp_rate      | medical_hist<br>ory | text           | Respiratory rate                                                                                                                     |
| tachyp_yes     | medical_hist<br>ory | radio          | Tachypnea present?                                                                                                                   |
| tachyp_no      | medical_hist<br>ory | radio          | Tachypnea present?                                                                                                                   |
| oxyg_res       | medical_hist<br>ory | text           | Oxygen saturation                                                                                                                    |
| bld_syst       | medical_hist<br>ory | text           | Blood pressure result (Systolic)                                                                                                     |
| bld_diast      | medical_hist<br>ory | text           | Blood pressure result (Diastolic)                                                                                                    |
| temp_rest      | medical_hist<br>ory | text           | Temperature result                                                                                                                   |
| resp_dist      | medical_hist<br>ory | calc           | Respiratory distress symptoms?, (Yes, if any of options 1-7 is checked)                                                              |
| resp_req       | medical_hist<br>ory | calc           | Respiratory support required? (Yes, if any of options 1-6 is checked, No, if None is checked)                                        |
| resp_improv    | medical_hist<br>ory | radio          | Has respiratory support increased since day prior to specimen collection? Ie increased ventilation, new intubation, more O2 required |
| feed_prob      | medical_hist<br>ory | calc           | Does the infant have feeding problems                                                                                                |
| cardio_inst    | medical_hist<br>ory | calc           | Cardio vascular instability indicated?                                                                                               |
| cns_symp       | medical_hist<br>ory | checkbox<br>ox | Central Nervous System symptoms?                                                                                                     |
| umbil          | medical_hist<br>ory | radio          | Umplical sepsis noted?                                                                                                               |
| h2_startdate   | medical_hist<br>ory | text           | H2 blockers started?                                                                                                                 |
| curr_feed      | medical_hist<br>ory | checkbox<br>ox | Current feeding                                                                                                                      |
| feed_type      | medical_hist<br>ory | checkbox<br>ox | Type of feeding                                                                                                                      |
| abnorm_oth     | medical_hist<br>ory | text           | Other underlying abnormality, specify                                                                                                |
| antib_pos      | medical_hist<br>ory | dropdo<br>wn   | Antimicrobial treatment at time of positive culture?                                                                                 |
| wcc_count      | medical_hist<br>ory | text           | White cell count (WCC) results                                                                                                       |
| platelet_count | medical_hist<br>ory | text           | Platelets                                                                                                                            |
| abg_res        | medical_hist<br>ory | text           | Arterial Blood Gas STANDARD BASE EXCESS (SBE in mmol/L or mEq/L)                                                                     |

| Baby GERMS neonatal sepsis surveillance protocol |                     |       | Supplementary material                                                                                                                   |
|--------------------------------------------------|---------------------|-------|------------------------------------------------------------------------------------------------------------------------------------------|
| ph_result                                        | medical_hist<br>ory | text  | What was the patients pH?                                                                                                                |
| pco2_result                                      | medical_hist<br>ory | text  | What was the patients pCO2                                                                                                               |
| co2_unit                                         | medical_hist<br>ory | radio | What units is the pCO2 measured in                                                                                                       |
| hc03_result                                      | medical_hist<br>ory | text  | What was the patients HCO3 (in mmol/L)                                                                                                   |
| lumbar                                           | medical_hist<br>ory | radio | Was lumbar puncture performed for positive culture?                                                                                      |
| csf_wcc                                          | medical_hist<br>ory | text  | CSF WCC results                                                                                                                          |
| csf_res                                          | medical_hist<br>ory | radio | CSF Pleocytosis (for babies < 28 days and cell count >20cells/mm <sup>3</sup> ; or babies >28 days cell count >10cells/mm <sup>3</sup> ) |
| finout_inf                                       | main_outco<br>me    | radio | Final outcome at end of hospitalisation or after 30 days of specimen collection if still admitted for other reasons                      |
| fin_date                                         | main_outco<br>me    | text  | Date of final outcome infant                                                                                                             |
| neon_date                                        | main_outco<br>me    | text  | Date that NEONATE was 28 days old calculated from [birth_date] plus 27 days                                                              |
| outcome_neon                                     | main_outco<br>me    | radio | Neonate Outcome at 28 days                                                                                                               |
